# Supplementary material for: Bacterial Communities Associated with Crude Oil Bioremediation through Composting Approaches with Indigenous Bacterial Isolate
Source: MDPI journal article supplement (doi:10.3390/life12111712), 2022-10-27
Supplement: s1 [file s1]

# Supplementary Materials

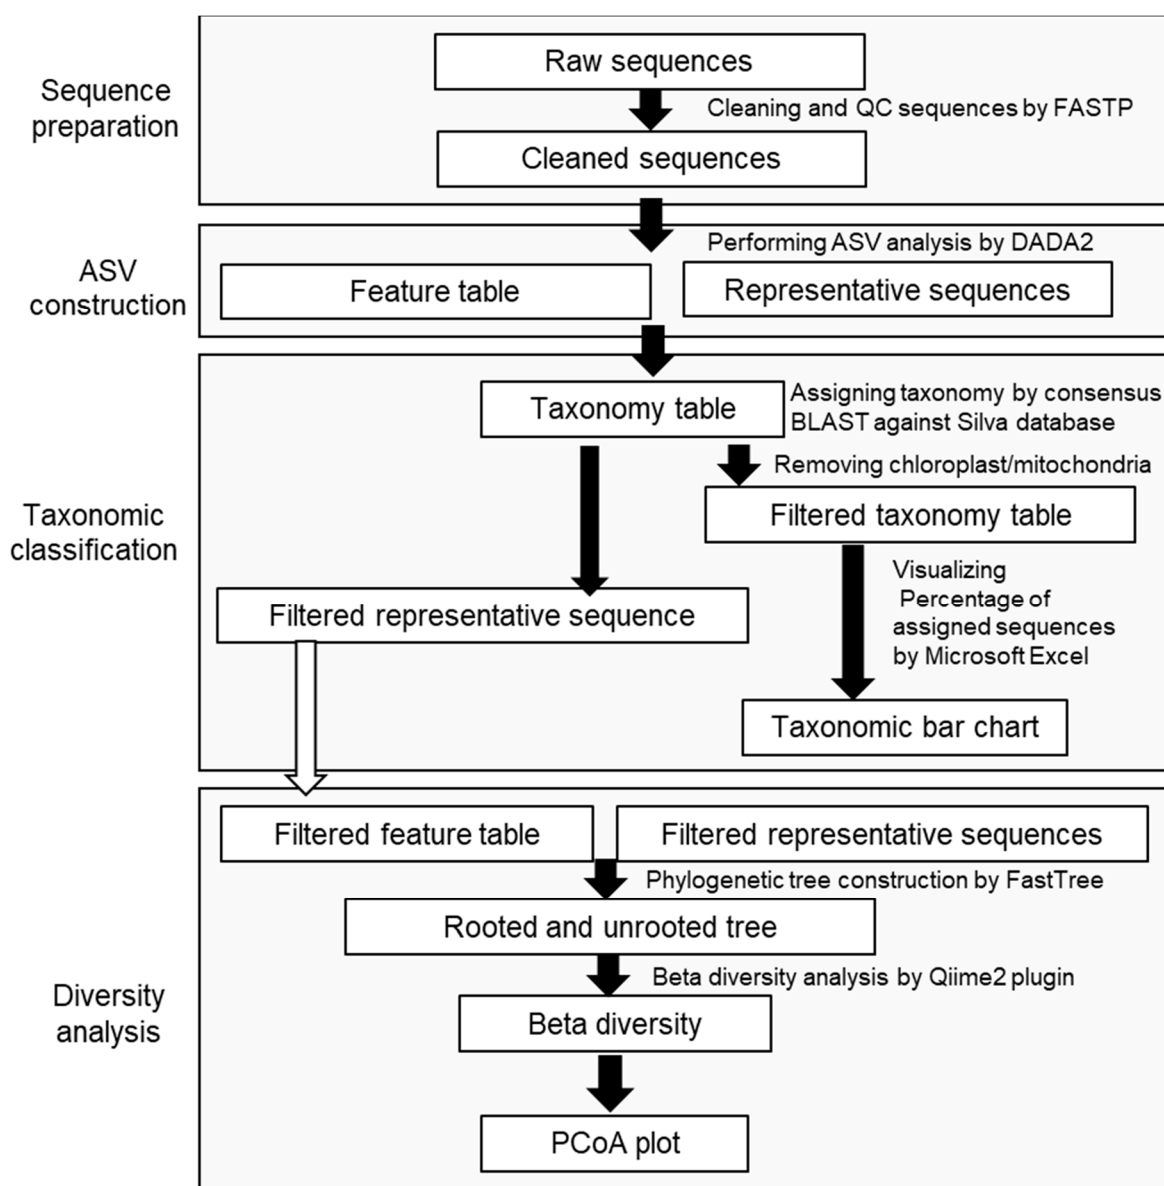

**Figure S1.** Analysis workflow of Next-Generation sequencing and bacterial community in this work. All pipelines and tools used in this study are mentioned.

**Table S1.** Percentage of assigned sequence in the genus level in three different treatments.

| Genus                                             | Percentage of assinged sequence in genus level in three different treatments <sup>1</sup> |       |       |       |       |       |       |       |       |       |       |       |       |       |       |
|---------------------------------------------------|-------------------------------------------------------------------------------------------|-------|-------|-------|-------|-------|-------|-------|-------|-------|-------|-------|-------|-------|-------|
|                                                   | S0                                                                                        | S1    | S2    | S3    | S4    | SW0   | SW1   | SW2   | SW3   | SW4   | SWB0  | SWB1  | SWB2  | SWB3  | SWB4  |
| Unassigned; Other                                 | 1.60                                                                                      | 3.65  | 11.93 | 14.90 | 12.70 | 2.51  | 10.07 | 27.70 | 51.87 | 26.10 | 1.44  | 6.38  | 7.81  | 37.23 | 28.76 |
| <i>Acetobacter</i>                                | 41.26                                                                                     | 38.00 | 2.98  | 1.65  | 3.65  | 42.95 | 58.26 | 29.18 | 18.53 | 19.81 | 36.97 | 74.93 | 32.75 | 18.64 | 35.13 |
| <i>Acinetobacter</i>                              | 0.30                                                                                      | 0.13  | 0.00  | 0.35  | 0.56  | 0.14  | 1.49  | 0.28  | 0.00  | 0.00  | 0.08  | 0.00  | 0.00  | 0.00  | 0.36  |
| <i>Actinomyces</i>                                | 0.00                                                                                      | 0.00  | 0.09  | 0.07  | 0.06  | 0.00  | 1.32  | 1.75  | 0.78  | 2.51  | 0.00  | 0.25  | 1.16  | 0.72  | 0.93  |
| <i>Actinophytocola</i>                            | 0.00                                                                                      | 0.00  | 0.55  | 0.37  | 0.33  | 0.00  | 0.00  | 0.00  | 0.00  | 0.00  | 0.00  | 0.00  | 0.00  | 0.00  | 0.00  |
| <i>Amycolatopsis</i>                              | 0.67                                                                                      | 0.72  | 3.92  | 3.21  | 1.69  | 0.00  | 0.00  | 0.00  | 0.00  | 0.00  | 0.00  | 0.00  | 0.00  | 0.00  | 0.00  |
| <i>Anaerocolumna</i>                              | 0.00                                                                                      | 0.00  | 0.12  | 0.02  | 0.00  | 0.00  | 0.61  | 1.37  | 0.21  | 0.56  | 0.00  | 0.10  | 0.09  | 0.10  | 0.00  |
| <i>Anaerotruncus</i>                              | 0.00                                                                                      | 0.00  | 0.00  | 0.07  | 0.03  | 0.00  | 0.10  | 1.08  | 0.80  | 1.07  | 0.00  | 0.00  | 0.56  | 0.55  | 0.80  |
| <i>Aquabacterium</i>                              | 0.00                                                                                      | 0.04  | 0.34  | 0.23  | 0.25  | 0.00  | 0.00  | 0.00  | 0.00  | 0.00  | 0.00  | 0.00  | 0.00  | 0.00  | 0.00  |
| <i>Bacillus</i>                                   | 0.68                                                                                      | 0.36  | 0.18  | 0.00  | 0.09  | 1.34  | 0.13  | 0.25  | 0.00  | 1.04  | 0.67  | 0.00  | 0.00  | 0.00  | 0.00  |
| <i>Bifidobacterium</i>                            | 0.00                                                                                      | 0.00  | 0.15  | 0.24  | 0.44  | 0.00  | 3.04  | 6.52  | 2.33  | 0.94  | 0.00  | 3.97  | 5.24  | 4.01  | 2.12  |
| <i>Bradyrhizobium</i>                             | 0.29                                                                                      | 0.36  | 3.24  | 1.86  | 1.21  | 0.00  | 0.00  | 0.00  | 0.00  | 0.00  | 0.00  | 0.00  | 0.00  | 0.00  | 0.00  |
| <i>Burkholderia-Caballeronia-Paraburkholderia</i> | 0.11                                                                                      | 0.21  | 0.94  | 0.71  | 0.36  | 0.00  | 0.07  | 0.00  | 0.00  | 0.08  | 0.00  | 0.00  | 0.00  | 0.00  | 0.00  |
| <i>Caproiciproducens</i>                          | 0.00                                                                                      | 0.00  | 0.00  | 0.00  | 0.23  | 0.00  | 0.08  | 0.62  | 0.49  | 0.40  | 0.00  | 0.00  | 0.75  | 0.26  | 0.34  |
| <i>Christensenellaceae R-7 group</i>              | 0.00                                                                                      | 0.00  | 0.00  | 0.00  | 0.00  | 0.00  | 0.00  | 0.00  | 0.00  | 3.81  | 0.00  | 0.00  | 0.02  | 0.03  | 0.28  |
| <i>Clostridium sensu stricto 12</i>               | 0.00                                                                                      | 0.00  | 0.00  | 0.14  | 0.10  | 0.00  | 2.04  | 0.85  | 0.37  | 1.98  | 0.00  | 0.64  | 0.57  | 0.38  | 0.00  |
| <i>Cutibacterium</i>                              | 0.46                                                                                      | 0.00  | 0.09  | 0.00  | 0.00  | 0.09  | 0.82  | 0.14  | 0.00  | 0.22  | 0.00  | 0.00  | 0.00  | 0.00  | 1.04  |
| <i>Dialister</i>                                  | 0.00                                                                                      | 0.00  | 0.00  | 0.07  | 0.04  | 0.00  | 0.96  | 0.83  | 0.74  | 0.63  | 0.00  | 0.55  | 0.53  | 0.80  | 0.83  |
| <i>Dokdonella</i>                                 | 0.06                                                                                      | 0.09  | 0.17  | 0.26  | 0.24  | 0.00  | 0.00  | 0.00  | 0.00  | 0.00  | 0.00  | 0.00  | 0.00  | 0.00  | 0.00  |
| <i>Dongia</i>                                     | 0.12                                                                                      | 0.16  | 1.13  | 1.54  | 1.17  | 0.00  | 0.00  | 0.00  | 0.00  | 0.00  | 0.00  | 0.00  | 0.00  | 0.00  | 0.00  |
| <i>Enterobacter</i>                               | 0.27                                                                                      | 0.27  | 0.00  | 0.00  | 0.00  | 0.94  | 0.14  | 0.14  | 0.00  | 0.00  | 0.51  | 0.00  | 0.00  | 0.00  | 0.00  |
| <i>Fonticella</i>                                 | 0.00                                                                                      | 0.00  | 0.00  | 0.00  | 0.00  | 0.00  | 0.00  | 0.00  | 0.00  | 1.64  | 0.00  | 0.00  | 0.04  | 0.05  | 0.00  |
| <i>Gemmata</i>                                    | 0.05                                                                                      | 0.11  | 1.76  | 1.56  | 0.54  | 0.00  | 0.00  | 0.00  | 0.00  | 0.00  | 0.00  | 0.00  | 0.00  | 0.00  | 0.00  |
| <i>Gluconacetobacter</i>                          | 0.00                                                                                      | 0.00  | 0.00  | 0.00  | 0.05  | 0.00  | 0.12  | 0.00  | 0.00  | 0.00  | 0.00  | 0.00  | 0.32  | 0.00  | 0.00  |
| <i>Gluconobacter</i>                              | 0.29                                                                                      | 0.06  | 0.00  | 0.00  | 0.00  | 0.28  | 0.13  | 0.00  | 0.00  | 0.00  | 0.32  | 0.00  | 0.00  | 0.00  | 0.00  |
| <i>Herbinix</i>                                   | 0.00                                                                                      | 0.00  | 0.00  | 0.05  | 0.08  | 0.00  | 0.00  | 0.33  | 0.81  | 0.98  | 0.00  | 0.00  | 0.11  | 0.29  | 1.50  |
| <i>Immundisolibacter</i>                          | 0.21                                                                                      | 0.57  | 2.60  | 0.91  | 0.95  | 0.00  | 0.00  | 0.00  | 0.00  | 0.00  | 0.00  | 0.00  | 0.00  | 0.00  | 0.00  |
| <i>Inquilinus</i>                                 | 0.06                                                                                      | 0.22  | 0.64  | 1.76  | 0.85  | 0.00  | 0.00  | 0.00  | 0.00  | 0.00  | 0.00  | 0.00  | 0.00  | 0.00  | 0.00  |
| KCM-B-112                                         | 0.64                                                                                      | 0.83  | 3.25  | 0.41  | 0.53  | 0.12  | 0.00  | 0.00  | 0.00  | 0.00  | 0.04  | 0.00  | 0.00  | 0.00  | 0.00  |
| <i>Klebsiella</i>                                 | 0.45                                                                                      | 0.19  | 0.00  | 0.00  | 0.00  | 0.91  | 0.08  | 0.00  | 0.00  | 0.00  | 0.63  | 0.00  | 0.00  | 0.00  | 0.00  |

<sup>1</sup> S: untreated soil, SW: soil composted with organic waste, SWB: soil composted with organic waste with the addition of crude oil degrading bacterium M07. The numbers following these abbreviations represent the week of composting processes.

Table S1. Cont.

| Genus                          | Percentage of assigned sequence in genus level in three different treatments <sup>1</sup> |       |       |       |       |       |      |       |       |       |       |      |       |       |       |
|--------------------------------|-------------------------------------------------------------------------------------------|-------|-------|-------|-------|-------|------|-------|-------|-------|-------|------|-------|-------|-------|
|                                | S0                                                                                        | S1    | S2    | S3    | S4    | SW0   | SW1  | SW2   | SW3   | SW4   | SWB0  | SWB1 | SWB2  | SWB3  | SWB4  |
| <i>Komagataebacter</i>         | 0.22                                                                                      | 0.14  | 0.06  | 0.10  | 0.10  | 0.25  | 0.28 | 0.21  | 0.16  | 0.18  | 0.06  | 0.16 | 0.06  | 0.05  | 0.00  |
| <i>Lachnoclostridium</i> 5     | 0.00                                                                                      | 0.00  | 0.00  | 0.03  | 0.06  | 0.00  | 1.03 | 0.07  | 0.00  | 0.46  | 0.00  | 0.91 | 0.09  | 0.00  | 0.00  |
| <i>Lactobacillus</i>           | 29.02                                                                                     | 25.51 | 0.00  | 0.22  | 0.23  | 27.21 | 5.37 | 2.13  | 0.09  | 0.58  | 39.04 | 1.95 | 0.68  | 0.35  | 0.00  |
| <i>Lactococcus</i>             | 0.99                                                                                      | 1.15  | 0.00  | 0.30  | 0.00  | 2.86  | 0.34 | 0.18  | 0.00  | 0.00  | 0.42  | 0.00 | 0.00  | 0.00  | 0.00  |
| <i>Leuconostoc</i>             | 6.01                                                                                      | 4.62  | 0.00  | 0.07  | 0.06  | 13.72 | 0.89 | 0.61  | 0.00  | 0.15  | 9.86  | 0.25 | 0.04  | 0.05  | 0.00  |
| <i>Luteimonas</i>              | 0.04                                                                                      | 0.08  | 0.31  | 0.28  | 0.23  | 0.00  | 0.06 | 0.00  | 0.00  | 0.00  | 0.00  | 0.00 | 0.00  | 0.00  | 0.00  |
| <i>Lysinibacillus</i>          | 0.00                                                                                      | 0.00  | 0.00  | 0.00  | 0.00  | 0.00  | 0.00 | 0.16  | 0.25  | 0.49  | 0.00  | 0.00 | 0.83  | 0.75  | 0.28  |
| <i>Lysobacter</i>              | 0.38                                                                                      | 0.92  | 2.16  | 2.25  | 1.49  | 0.00  | 0.00 | 0.00  | 0.00  | 0.00  | 0.00  | 0.00 | 0.00  | 0.00  | 0.00  |
| <i>Megasphaera</i>             | 0.00                                                                                      | 0.00  | 0.24  | 0.14  | 0.11  | 0.00  | 3.97 | 1.86  | 0.17  | 0.15  | 0.00  | 2.78 | 0.30  | 0.20  | 0.00  |
| <i>Microbacterium</i>          | 0.48                                                                                      | 0.92  | 5.31  | 2.52  | 2.10  | 0.04  | 0.05 | 0.00  | 0.00  | 0.00  | 0.00  | 0.00 | 0.00  | 0.00  | 0.00  |
| <i>Mycobacterium</i>           | 3.13                                                                                      | 3.55  | 12.26 | 9.16  | 7.09  | 0.05  | 0.00 | 0.00  | 0.00  | 0.14  | 0.00  | 0.00 | 0.11  | 0.16  | 0.00  |
| <i>Nocardia</i>                | 0.44                                                                                      | 0.85  | 3.77  | 1.82  | 1.58  | 0.00  | 0.00 | 0.00  | 0.00  | 0.00  | 0.00  | 0.00 | 0.02  | 0.00  | 0.00  |
| <i>Phenyllobacterium</i>       | 0.00                                                                                      | 0.00  | 0.22  | 0.41  | 0.57  | 0.00  | 0.00 | 0.00  | 0.00  | 0.00  | 0.00  | 0.00 | 0.00  | 0.00  | 0.00  |
| <i>Prevotella</i>              | 0.00                                                                                      | 0.00  | 0.78  | 0.51  | 0.30  | 0.13  | 0.49 | 15.54 | 18.46 | 18.99 | 0.00  | 4.11 | 42.55 | 31.37 | 15.10 |
| <i>Promicromonospora</i>       | 0.09                                                                                      | 0.11  | 0.83  | 0.87  | 0.83  | 0.00  | 0.00 | 0.00  | 0.00  | 0.00  | 0.00  | 0.00 | 0.00  | 0.00  | 0.00  |
| <i>Pseudoclavibacter</i>       | 0.00                                                                                      | 0.00  | 0.00  | 0.00  | 0.01  | 0.00  | 0.05 | 0.54  | 0.23  | 1.79  | 0.00  | 0.00 | 0.13  | 0.06  | 0.98  |
| <i>Pseudomonas</i>             | 2.00                                                                                      | 1.69  | 0.21  | 0.22  | 0.05  | 0.00  | 0.00 | 0.00  | 0.00  | 0.00  | 5.75  | 0.00 | 0.00  | 0.00  | 0.00  |
| <i>Pseudoxanthomonas</i>       | 0.38                                                                                      | 0.98  | 3.37  | 2.01  | 1.30  | 0.00  | 0.00 | 0.00  | 0.00  | 0.00  | 0.00  | 0.00 | 0.00  | 0.00  | 0.00  |
| <i>Reyranella</i>              | 1.53                                                                                      | 3.57  | 12.17 | 12.20 | 6.59  | 0.00  | 0.00 | 0.00  | 0.00  | 0.00  | 0.00  | 0.00 | 0.01  | 0.04  | 0.00  |
| <i>Roseburia</i>               | 0.00                                                                                      | 0.00  | 0.00  | 0.07  | 0.07  | 0.00  | 1.53 | 0.00  | 0.00  | 0.12  | 0.00  | 0.00 | 0.04  | 0.00  | 0.00  |
| <i>Roseomonas</i>              | 0.00                                                                                      | 0.12  | 1.18  | 1.01  | 0.57  | 0.00  | 0.00 | 0.00  | 0.00  | 0.00  | 0.00  | 0.00 | 0.00  | 0.00  | 0.00  |
| <i>Ruminiclostridium</i>       | 0.00                                                                                      | 0.00  | 0.00  | 0.02  | 0.14  | 0.00  | 0.12 | 0.08  | 0.21  | 4.31  | 0.00  | 0.00 | 0.09  | 0.00  | 0.34  |
| <i>Ruminococcaceae</i> UCG-010 | 0.00                                                                                      | 0.00  | 0.00  | 0.00  | 0.04  | 0.00  | 0.00 | 0.00  | 0.00  | 1.18  | 0.00  | 0.00 | 0.00  | 0.00  | 0.00  |
| <i>Rummeliibacillus</i>        | 0.00                                                                                      | 0.00  | 0.00  | 0.02  | 0.02  | 0.00  | 0.00 | 0.33  | 0.16  | 1.25  | 0.00  | 0.00 | 0.61  | 0.15  | 1.14  |
| <i>Saccharopolyspora</i>       | 0.00                                                                                      | 0.00  | 0.21  | 0.35  | 0.56  | 0.00  | 0.00 | 0.00  | 0.00  | 0.00  | 0.00  | 0.00 | 0.00  | 0.00  | 0.00  |
| <i>Sedimentibacter</i>         | 0.00                                                                                      | 0.00  | 0.00  | 0.03  | 0.12  | 0.00  | 0.59 | 1.13  | 0.77  | 3.52  | 0.00  | 0.00 | 0.45  | 0.14  | 0.96  |
| <i>Serratia</i>                | 1.64                                                                                      | 1.13  | 0.40  | 0.29  | 0.26  | 0.07  | 0.00 | 0.00  | 0.00  | 0.10  | 0.00  | 0.00 | 0.02  | 0.00  | 0.00  |
| <i>Stenotrophomonas</i>        | 0.44                                                                                      | 0.43  | 0.32  | 0.28  | 0.26  | 0.27  | 0.41 | 2.07  | 1.07  | 2.40  | 0.13  | 0.00 | 1.67  | 0.65  | 4.66  |
| <i>Streptomyces</i>            | 2.33                                                                                      | 4.80  | 22.01 | 33.89 | 48.35 | 0.00  | 1.00 | 0.09  | 0.08  | 0.15  | 0.00  | 0.00 | 0.12  | 0.22  | 0.80  |
| <i>Sutterella</i>              | 0.00                                                                                      | 0.00  | 0.11  | 0.16  | 0.17  | 0.00  | 3.34 | 2.20  | 0.78  | 1.39  | 0.00  | 2.91 | 1.65  | 2.09  | 1.61  |
| <i>Terrimonas</i>              | 0.00                                                                                      | 0.10  | 0.00  | 0.41  | 0.25  | 0.00  | 0.00 | 0.00  | 0.00  | 0.00  | 0.00  | 0.00 | 0.00  | 0.00  | 0.00  |
| <i>Weissella</i>               | 3.39                                                                                      | 3.34  | 0.00  | 0.00  | 0.00  | 6.11  | 0.31 | 0.40  | 0.00  | 0.19  | 4.07  | 0.07 | 0.09  | 0.04  | 0.00  |
| <i>Xanthomonas</i>             | 0.00                                                                                      | 0.00  | 0.00  | 0.00  | 0.36  | 0.00  | 0.70 | 1.39  | 0.60  | 0.67  | 0.00  | 0.05 | 0.51  | 0.62  | 2.02  |

<sup>1</sup> S: untreated soil, SW: soil composted with organic waste, SWB: soil composted with organic waste with the addition of crude oil degrading bacterium M07. The numbers following these abbreviations represent the week of composting processes.
